# Supplementary material for: Analysis of national surveillance of respiratory pathogens for community-acquired pneumonia in children and adolescents
Source: Springer Nature journal article supplement (doi:10.1186/s12879-022-07263-z), 2022-04-04
Supplement: MOESM1 [file 20281918]

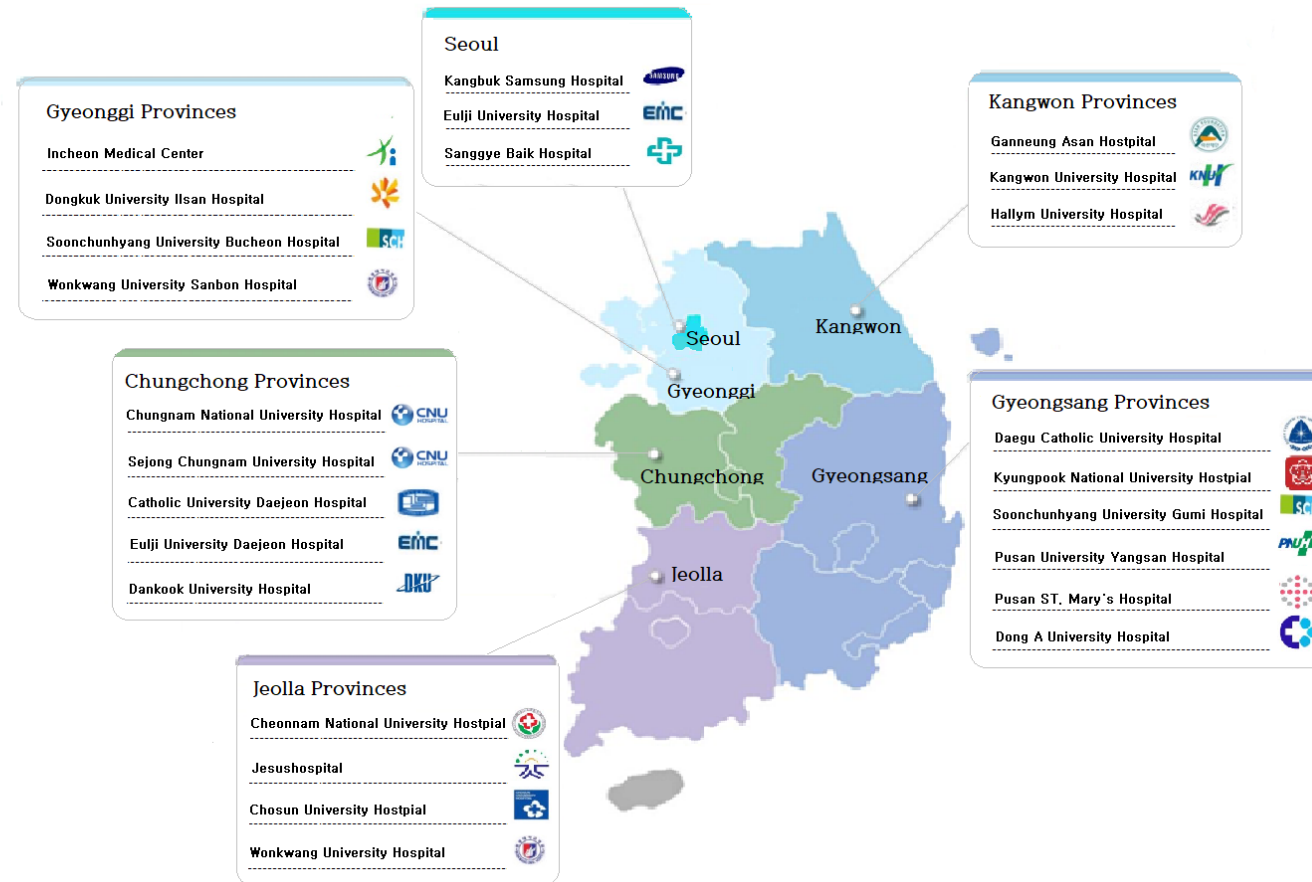

**Figure S1.** The Korean Childhood Community Acquired Pneumonia Study Group; KoC-CAPS
