# Supplementary material for: Analysis of national surveillance of respiratory pathogens for community-acquired pneumonia in children and adolescents
Source: Springer Nature journal article supplement (doi:10.1186/s12879-022-07263-z), 2022-04-04
Supplement: MOESM2 [file 20281918]

**Table S1. Community acquired pneumonia -Clinical information records**

|                                                                                                                                                                                                                                                                                                                                                                                                                                                                                                                                                                                                                                                                                                                    |                                                                                                                                                                                                                                                                                                                                                                                                   |
|--------------------------------------------------------------------------------------------------------------------------------------------------------------------------------------------------------------------------------------------------------------------------------------------------------------------------------------------------------------------------------------------------------------------------------------------------------------------------------------------------------------------------------------------------------------------------------------------------------------------------------------------------------------------------------------------------------------------|---------------------------------------------------------------------------------------------------------------------------------------------------------------------------------------------------------------------------------------------------------------------------------------------------------------------------------------------------------------------------------------------------|
| <b>Name:</b>                                                                                                                                                                                                                                                                                                                                                                                                                                                                                                                                                                                                                                                                                                       | <b>Physical examination</b><br><input type="checkbox"/> RR(max:            ) <input type="checkbox"/> hypoxia(SpO2<95%)<br><input type="checkbox"/> rale or crackle <input type="checkbox"/> wheezing<br><input type="checkbox"/> retraction <input type="checkbox"/> decreased aeration                                                                                                          |
| <b>Birth date:</b>                                                                                                                                                                                                                                                                                                                                                                                                                                                                                                                                                                                                                                                                                                 | <b>Chest X-ray (infiltration)</b><br><input type="checkbox"/> peribronchial <input type="checkbox"/> interstitial<br><input type="checkbox"/> lobar(RUL, RML, RLL, LUL, LLL)<br><input type="checkbox"/> pleural effusion(Rt/Lt)                                                                                                                                                                  |
| <b>Sex: M/F</b>                                                                                                                                                                                                                                                                                                                                                                                                                                                                                                                                                                                                                                                                                                    | <b>Antibiotics prescription: N/Y</b><br><input type="checkbox"/> penicillin series<br><input type="checkbox"/> cephalosporin <input type="checkbox"/> macrolide<br><input type="checkbox"/> tetracycline <input type="checkbox"/> quinolone <input type="checkbox"/> aminoglycoside<br><input type="checkbox"/> carbapenem <input type="checkbox"/> glycopeptide<br><input type="checkbox"/> etc. |
| <b>Hospital name:</b>                                                                                                                                                                                                                                                                                                                                                                                                                                                                                                                                                                                                                                                                                              | <b>Underlying disease: N/Y</b><br><input type="checkbox"/> allergic disease: <input type="checkbox"/> cardiac disease:<br><input type="checkbox"/> kidney disease: <input type="checkbox"/> endocrine disease:<br><input type="checkbox"/> etc.                                                                                                                                                   |
| <b>Date of Sampling:</b>                                                                                                                                                                                                                                                                                                                                                                                                                                                                                                                                                                                                                                                                                           | <b>Attendance of day care center or school: N/Y</b>                                                                                                                                                                                                                                                                                                                                               |
| <b>Species of Sample:</b><br>NPA/Sputum/Throat swab/Transtracheal aspirate, BAL, etc                                                                                                                                                                                                                                                                                                                                                                                                                                                                                                                                                                                                                               | <b>Sibling: N/Y</b>                                                                                                                                                                                                                                                                                                                                                                               |
| <b>Admission:</b> N/Y (date of admission:            )<br>(date of discharge:                                    )                                                                                                                                                                                                                                                                                                                                                                                                                                                                                                                                                                                                 | <b>Special consideration:</b>                                                                                                                                                                                                                                                                                                                                                                     |
| <b>Vaccination:</b> N/Y- DTaP, Td, Tdap, pneumococcus/UK                                                                                                                                                                                                                                                                                                                                                                                                                                                                                                                                                                                                                                                           |                                                                                                                                                                                                                                                                                                                                                                                                   |
| <b>Chief Complaint:</b><br>Onset:                    days ago                                                                                                                                                                                                                                                                                                                                                                                                                                                                                                                                                                                                                                                      |                                                                                                                                                                                                                                                                                                                                                                                                   |
| <b>Minor Sytoms:</b><br><input type="checkbox"/> fever (duration:            days, up to            )<br><input type="checkbox"/> chills <input type="checkbox"/> sore throat<br><input type="checkbox"/> myalgia <input type="checkbox"/> cough<br><input type="checkbox"/> sputum <input type="checkbox"/> nasal obstruction<br><input type="checkbox"/> rhinorrhea <input type="checkbox"/> hoarseness<br><input type="checkbox"/> dyspnea <input type="checkbox"/> chest pain<br><input type="checkbox"/> hemotypsis <input type="checkbox"/> abdominal pain<br><input type="checkbox"/> vomiting <input type="checkbox"/> diarrhea<br><input type="checkbox"/> poor oral intake <input type="checkbox"/> rash |                                                                                                                                                                                                                                                                                                                                                                                                   |
| <b>AOM:</b> N/Y<br><b>Pertussis suspicion:</b> N/Y<br><input type="checkbox"/> whooping cough <input type="checkbox"/> paroxysmal cough<br><b>Mycoplasma pneumonia suspicion :</b> N/Y                                                                                                                                                                                                                                                                                                                                                                                                                                                                                                                             |                                                                                                                                                                                                                                                                                                                                                                                                   |

Abbreviations: NPA, nasopharyngeal aspirates; BAL, bronchoalveolar lavage; N, no; Y, yes; DTaP, Diphtheria-tetanus-acellular pertussis vaccine; Td, adult type diphtheria and tetanus toxoid vaccine; Tdap, booster tetanus toxoid, reduced diphtheria toxoid, and acellular pertussis vaccine; UK, unknown; AOM, acute otitis media

**Table S2. The PCR results of identified viral pathogen in the sputum**

| Pathogens     | N   |
|---------------|-----|
| HRV           | 44  |
| ADV           | 21  |
| RSV           | 19  |
| RSV A         | 10  |
| RSV B         | 9   |
| IFV A         | 9   |
| Flu A (H1)    | 0   |
| Flu A (pdm09) | 4   |
| Flu A (H3)    | 5   |
| IFV B         | 0   |
| PIV           | 4   |
| PIV 1         | 2   |
| PIV 2         | 0   |
| PIV 3         | 0   |
| PIV 4         | 2   |
| HMPV          | 5   |
| CoV           | 9   |
| CoV 229E      | 3   |
| CoV NL63      | 3   |
| CoV OC43      | 3   |
| HEV           | 3   |
| BoV           | 1   |
| Total         | 124 |

Abbreviations: N, number; HRV, human rhinovirus; ADV, adenovirus; RSV, respiratory syncytial virus; IFV, influenza virus; PIV, parainfluenza virus; HMPV, human metapneumovirus; CoV, coronavirus; HEV, human enterovirus; BoV, bocavirus

**Table S3. The PCR results of identified bacterial pathogen in the sputum**

| Pathogens             | N   |
|-----------------------|-----|
| <i>S. pneumoniae</i>  | 148 |
| <i>M. pneumoniae</i>  | 136 |
| <i>H. influenzae</i>  | 123 |
| <i>C. pneumoniae</i>  | 3   |
| <i>B. pertussis</i>   | 1   |
| <i>L. pneumophila</i> | 0   |
| Total                 | 411 |

Abbreviations: N, number

**Table S4. The culture results of identified bacterial pathogen in the sputum**

| Pathogens                          | N  |
|------------------------------------|----|
| <i>Streptococcus spp.</i>          | 16 |
| <i>Staphylococcus aureus</i>       | 8  |
| <i>Streptococcus parasanguinis</i> | 5  |
| <i>Candida albicans</i>            | 5  |
| <i>Streptococcus oralis</i>        | 5  |
| <i>Streptococcus mitis</i>         | 4  |
| <i>Neisseria spp.</i>              | 4  |
| <i>Streptococcus salivarius</i>    | 3  |
| <i>Rothia mucilaginosa</i>         | 3  |
| <i>Serratia marcescens</i>         | 2  |
| <i>Haemophilus influenzae</i>      | 2  |
| <i>Pseudomonas aeruginosa</i>      | 2  |
| <i>Pseudomonas spp.</i>            | 1  |
| <i>Staphylococcus epidermidis</i>  | 1  |
| <i>Streptococcus pneumoniae</i>    | 1  |
| <i>Streptococcus vestibularis</i>  | 1  |
| <i>Saccharomyces cerevisiae</i>    | 1  |
| <i>Staphylococcus carprae</i>      | 1  |
| <i>Candida spp.</i>                | 1  |
| <i>Staphylococcus lugdunensis</i>  | 1  |
| Total                              | 72 |

Abbreviations: N, number

**Table S5. The number of bacterial pathogens identified by culture in NPA, sputum, nasopharyngeal swab, etc.**

|                     | <i>S. aureus</i> | <i>H. influenzae</i> | <i>S. pneumoniae</i> | <i>K. pneumoniae</i> | <i>P. aeruginosa</i> |
|---------------------|------------------|----------------------|----------------------|----------------------|----------------------|
|                     | N                | N                    | N                    | N                    | N                    |
| NPA                 | 87               | 15                   | 86                   | 5                    | 10                   |
| Sputum              | 25               | 3                    | 4                    | 3                    | 3                    |
| Nasopharyngeal swab | 17               | 2                    |                      |                      |                      |
| Throat swab         | 1                |                      |                      |                      |                      |
| BAL                 |                  |                      | 1                    |                      |                      |
| Unknown             | 1                |                      | 1                    |                      |                      |
| Total               | 131              | 20                   | 92                   | 8                    | 13                   |

Abbreviations: NPA, nasopharyngeal aspirates; BAL, bronchoalveolar lavage; N, number
